# Supplementary material for: Introducing a 1,1-diphenylethylene analogue for vinylpyridine: anionic copolymerisation of 3-(1-phenylvinyl)pyridine (m-PyPE)
Source: Royal Society of Chemistry journal article supplement (doi:10.1039/d1py00302j), 2021-01-01
Supplement: d1py00302j1.pdf [file d1py00302j1.pdf]

## Supporting Information

### **Introducing a 1,1-diphenylethylene analogue for vinylpyridine: anionic copolymerisation of 3-(1-phenylvinyl)pyridine (*m*-PyPE)**

Marcel Fickenscher <sup>a</sup>, Tom Reimers <sup>a</sup> and Holger Frey <sup>\*a</sup>

---

<sup>a</sup>*Institute of Organic Chemistry, Johannes Gutenberg University, Duesbergweg 10-14, 55128 Mainz, Germany.*

Corresponding Author

E-Mail: [hfrey@uni-mainz.de](mailto:hfrey@uni-mainz.de)

## Table of Contents

|                                                       |    |
|-------------------------------------------------------|----|
| <i>m</i> -PyPE characterization.....                  | 3  |
| Copolymer NMR characterization .....                  | 6  |
| Calculation of the overall copolymer composition..... | 17 |
| Differential scanning calorimetry (DSC) .....         | 18 |
| Contact angle measurements.....                       | 21 |

# *m*-PyPE characterization

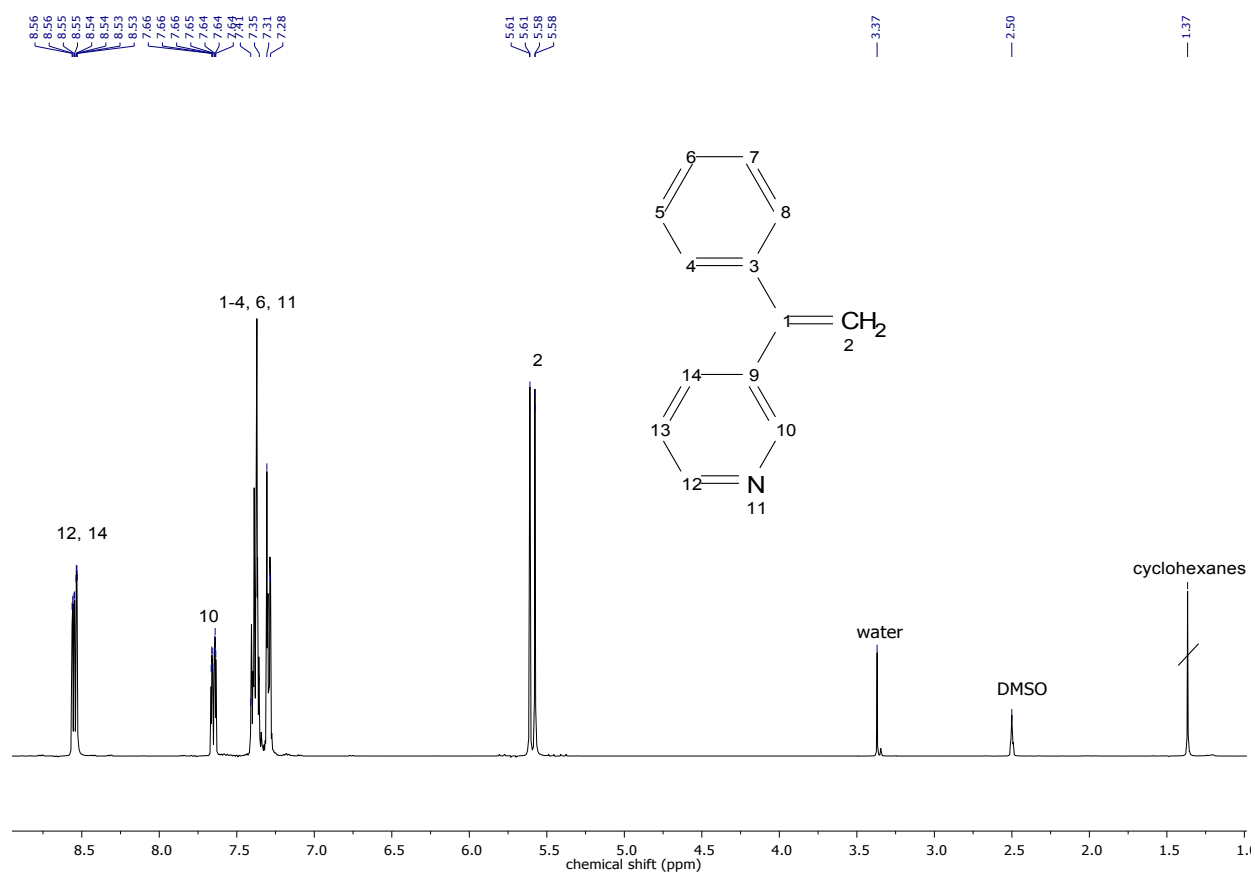

Figure S1: <sup>1</sup>H NMR spectrum (400 MHz, DMSO-d<sub>6</sub>) of *m*-PyPE.

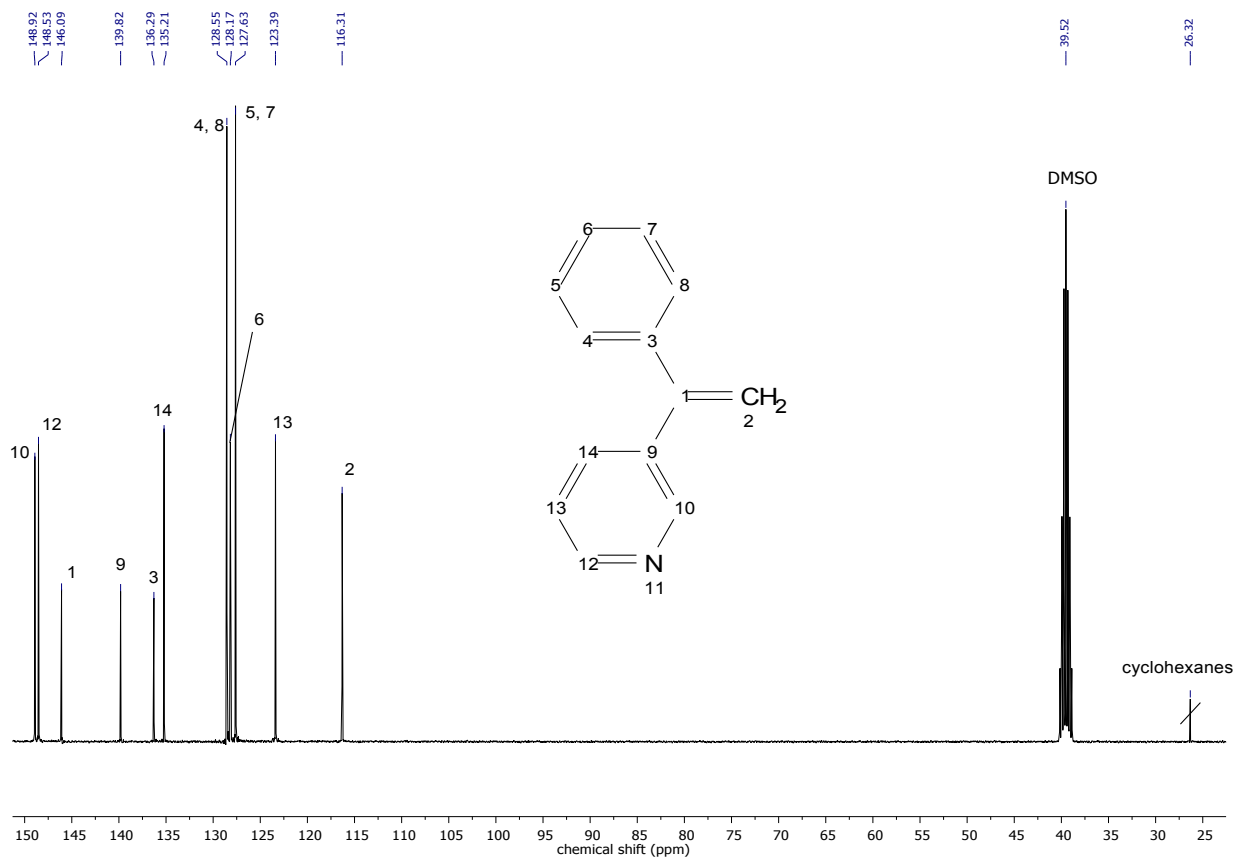

Figure S2: <sup>13</sup>C NMR spectrum (400 MHz, DMSO-d<sub>6</sub>) of *m*-PyPE.

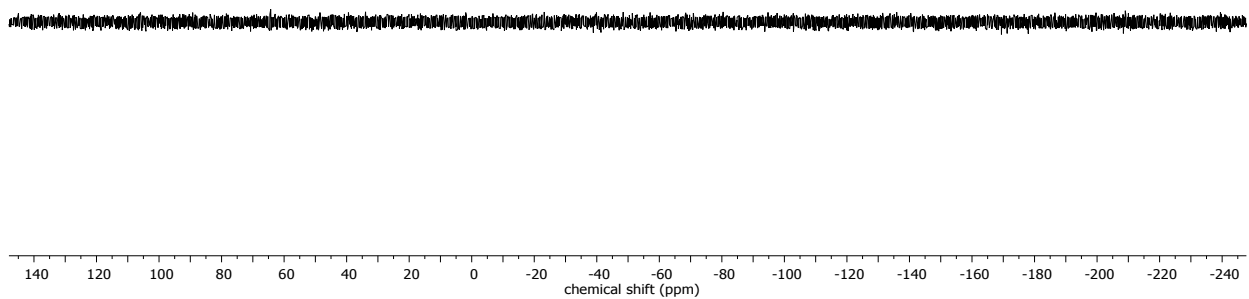

Figure S3: <sup>31</sup>P NMR spectrum (400 MHz, DMSO-d<sub>6</sub>) of *m*-PyPE, showing the absence of TPPO.

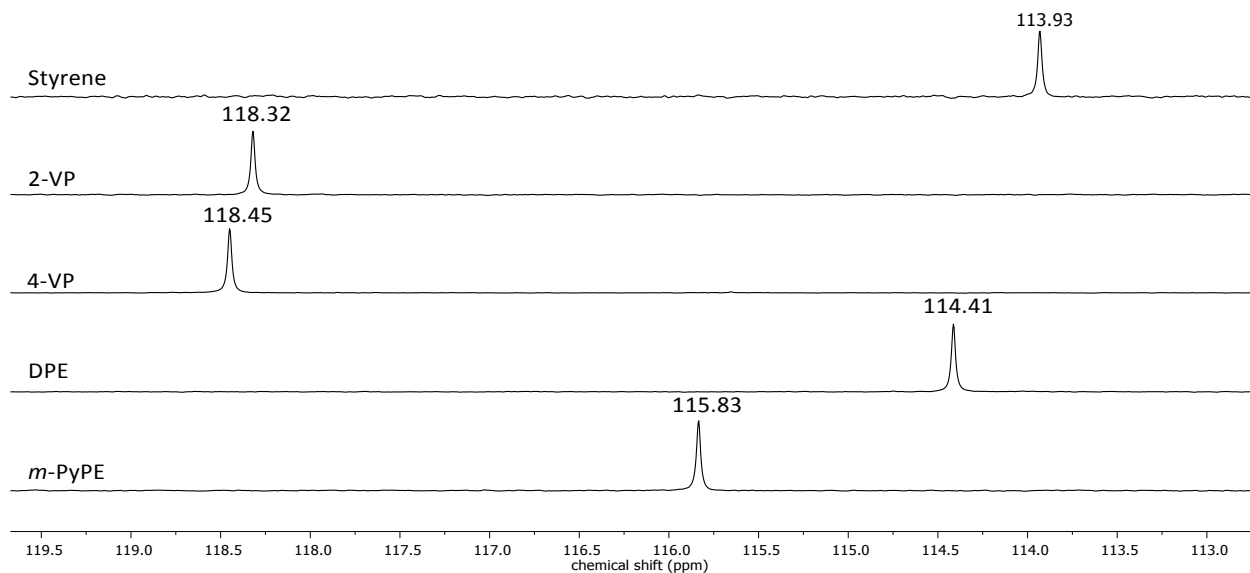

Figure S4:  $^{13}\text{C}$  NMR spectrum (400 MHz,  $\text{CDCl}_3$ ) of different monomers, showing the respective  $\beta$ -carbon shifts.

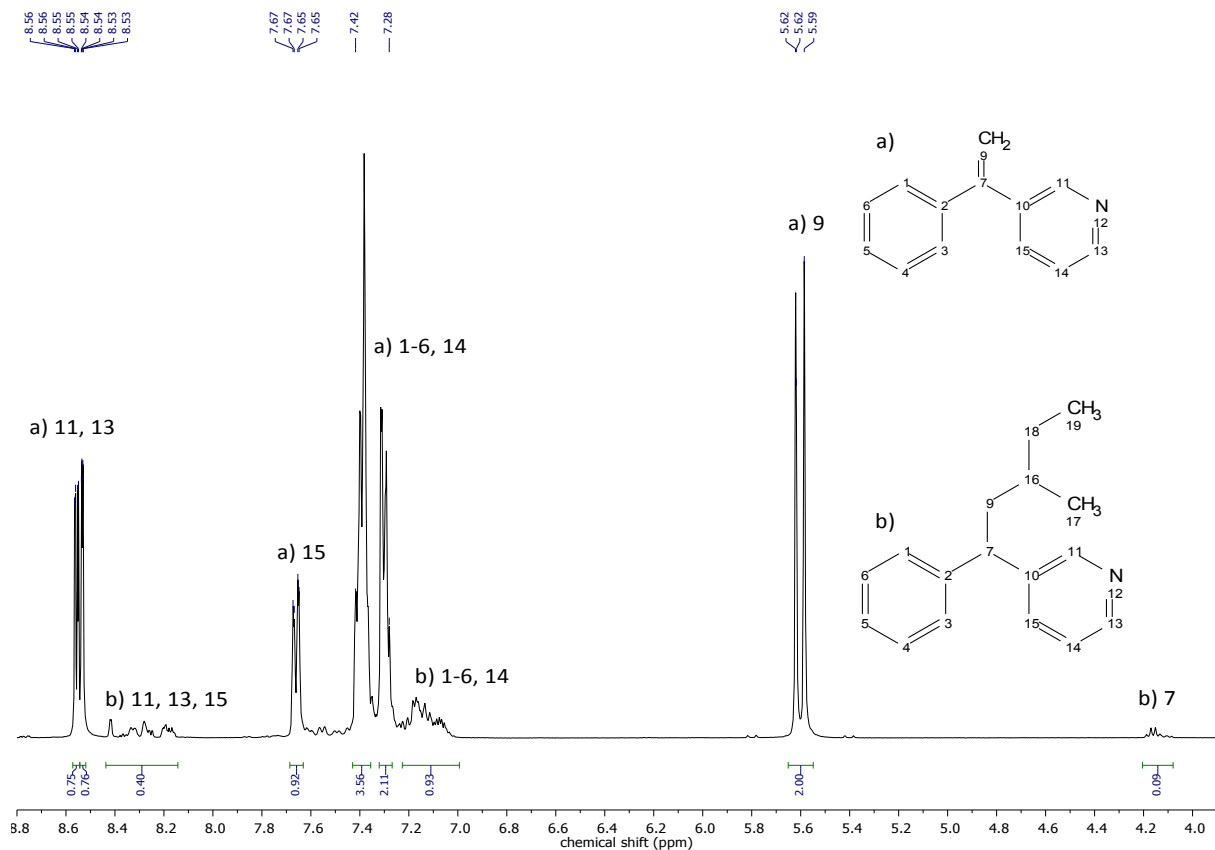

Figure S5:  $^1\text{H}$  NMR spectrum (400 MHz,  $\text{DMSO-d}_6$ ) of *s*-BuLi initiated *m*-PyPE, showing only the addition of the butyl group and no polymerization products.

# Copolymer NMR characterization

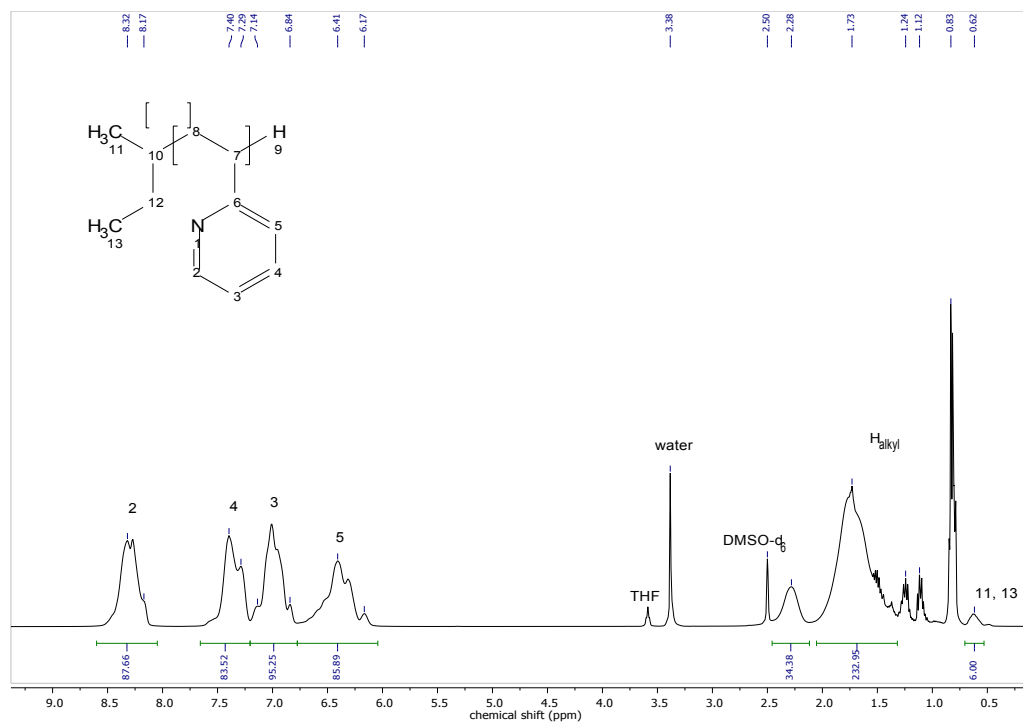

Figure S6: <sup>1</sup>H NMR spectrum (DMSO-d<sub>6</sub>, 400 MHz) of P(2-VP).

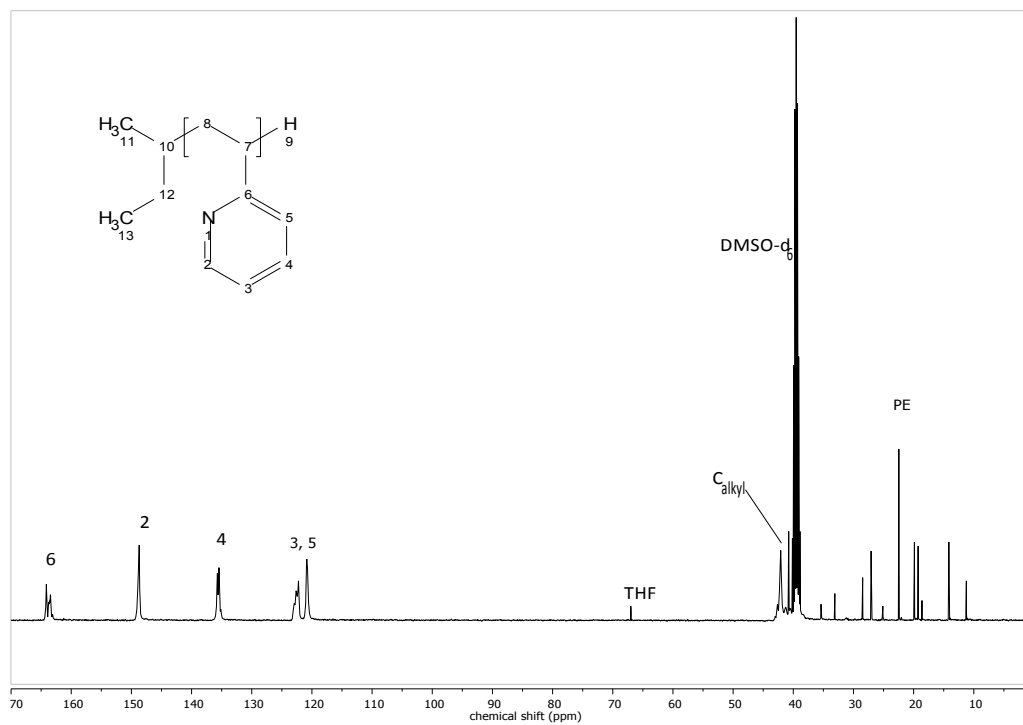

Figure S7: IG <sup>13</sup>C NMR spectrum (DMSO-d<sub>6</sub>, 400 MHz) of P(2-VP).

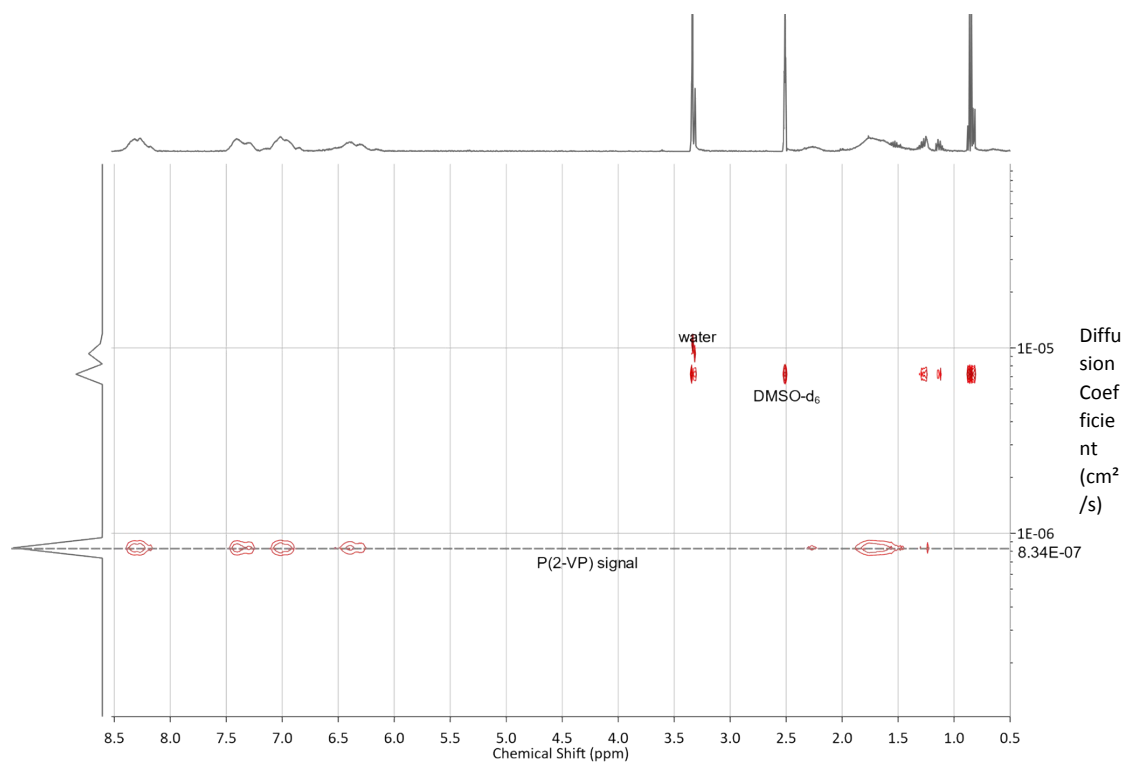

Figure S8: DOSY NMR spectrum (DMSO-d<sub>6</sub>, 400 MHz) of P(2-VP).

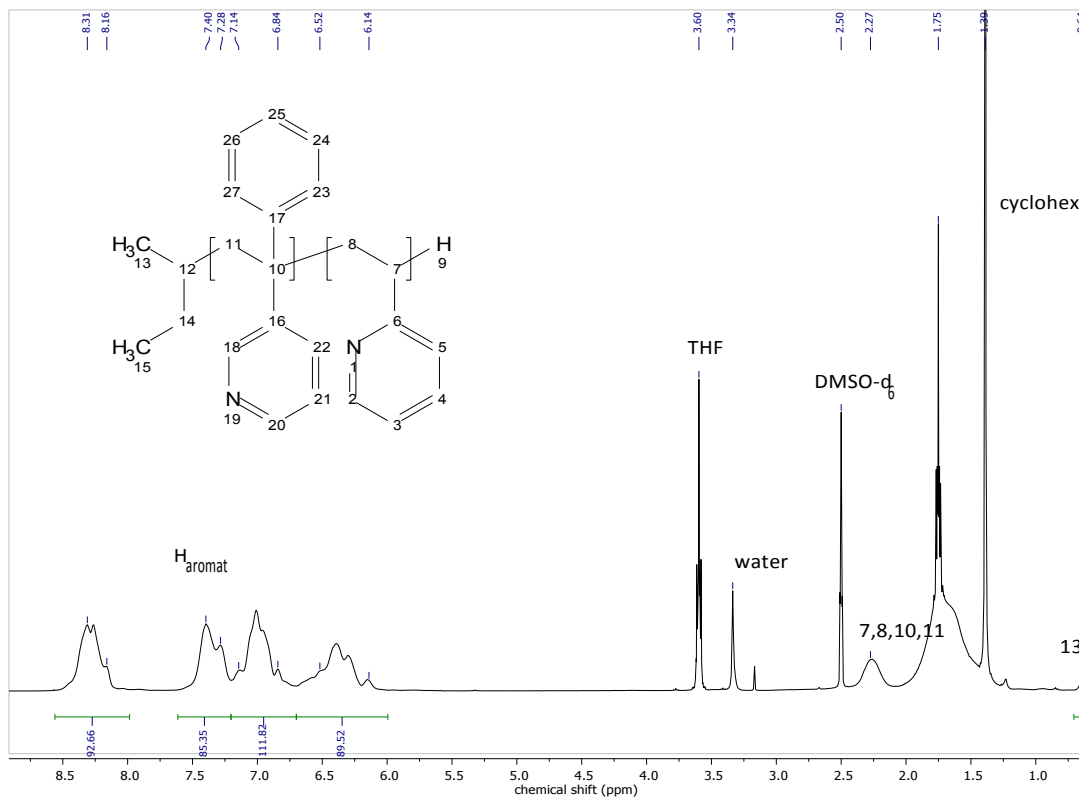

Figure S9: <sup>1</sup>H NMR spectrum (DMSO-d<sub>6</sub>, 400 MHz) of P(2-VP-stat-*m*-PyPE); 5% *m*-PyPE.

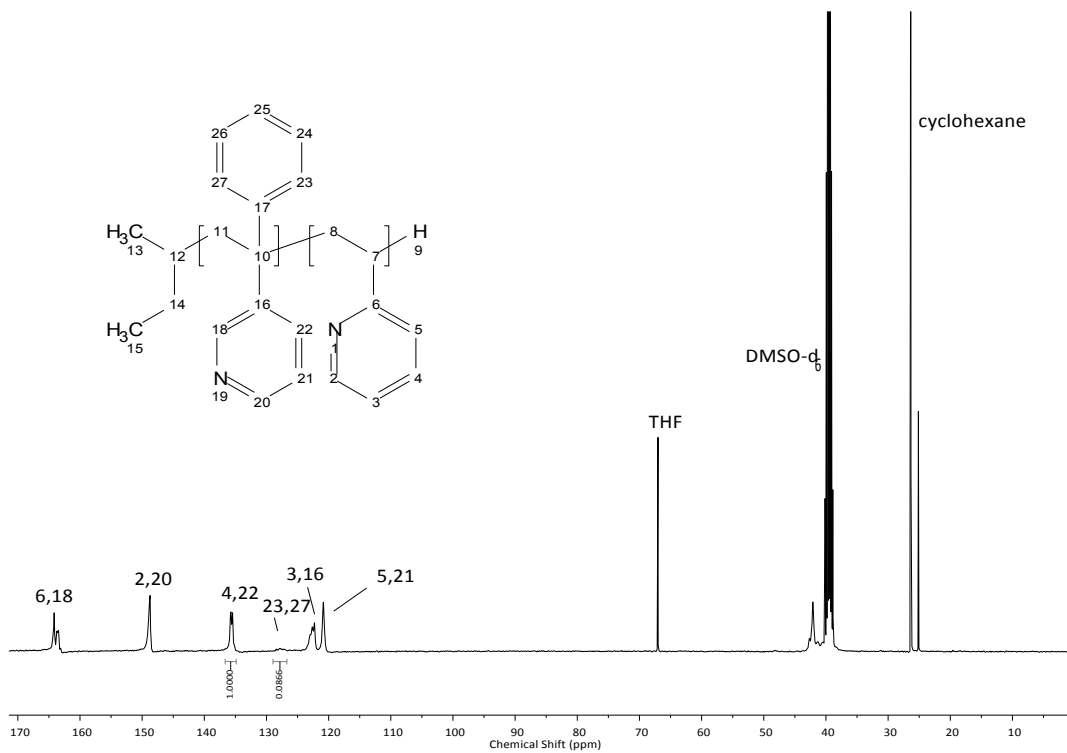

Figure S10: IG <sup>13</sup>C NMR spectrum (DMSO-d<sub>6</sub>, 400 MHz) of P(2-VP-stat-*m*-PyPE); 5% *m*-PyPE.



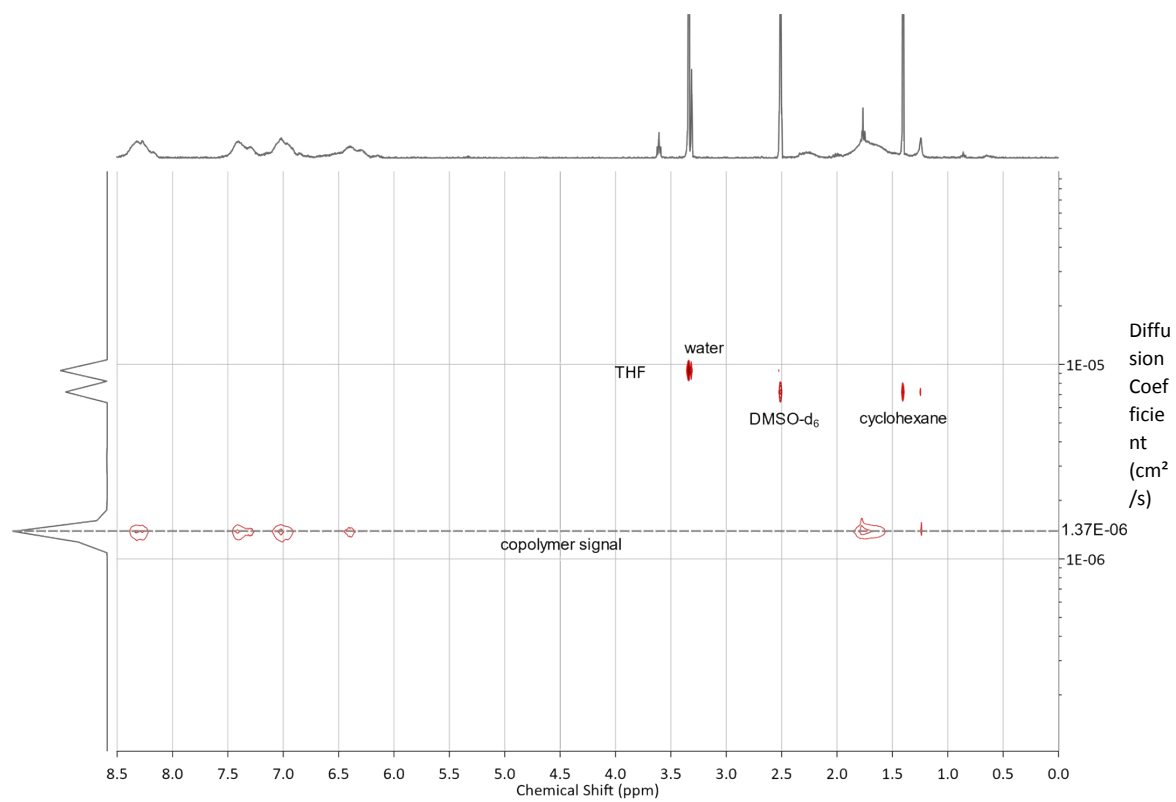

Figure S11: DOSY NMR spectrum (DMSO-d<sub>6</sub>, 400 MHz) of P(2-VP-stat-*m*-PyPE); 5% *m*-PyPE.

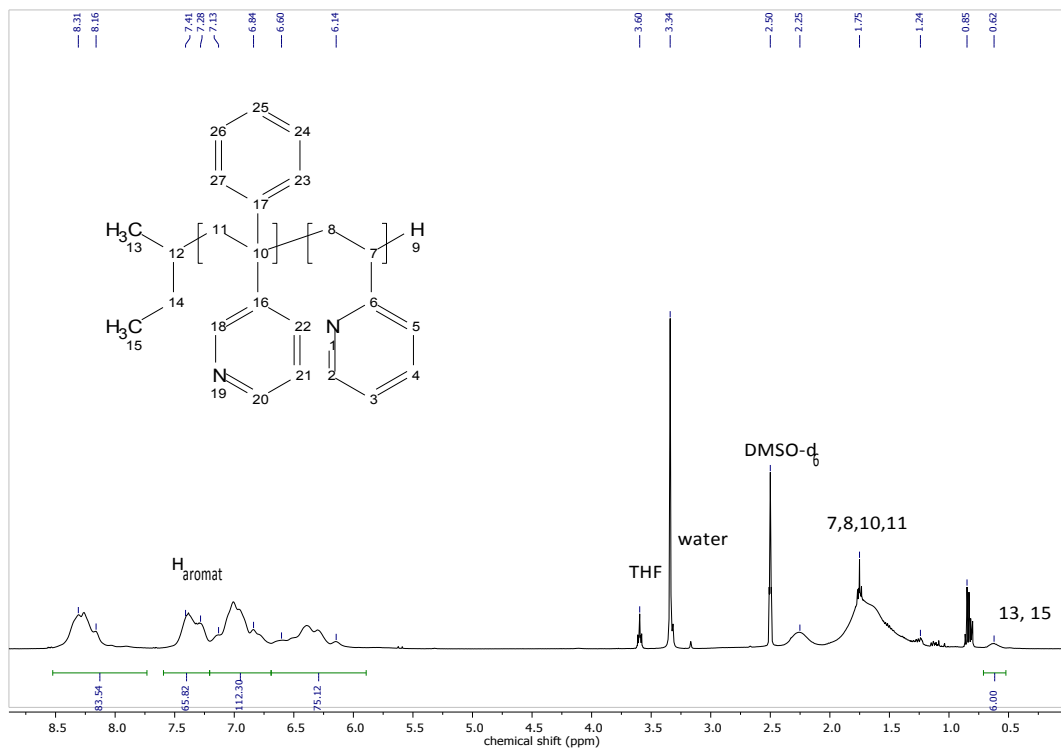

Figure S12:  $^1\text{H}$  NMR spectrum (DMSO- $d_6$ , 400 MHz) of P(2-VP-stat-*m*-PyPE); 10% *m*-PyPE.

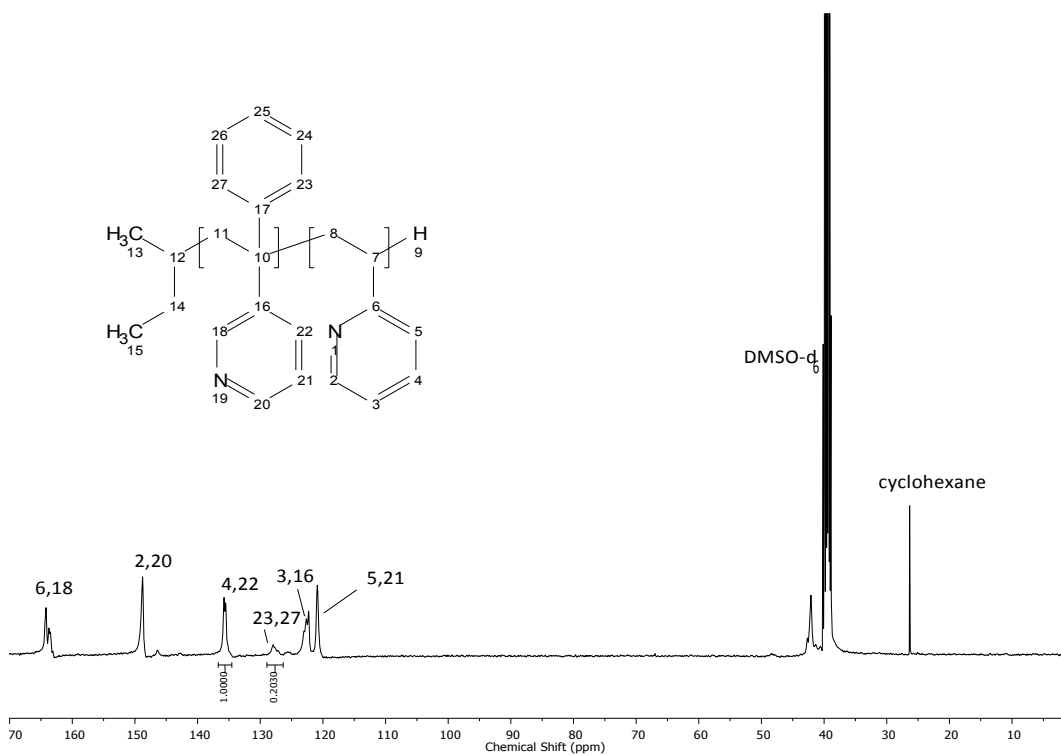

Figure S13: IG  $^{13}\text{C}$  NMR spectrum (DMSO- $d_6$ , 400 MHz) of P(2-VP-stat-*m*-PyPE); 10% *m*-PyPE.

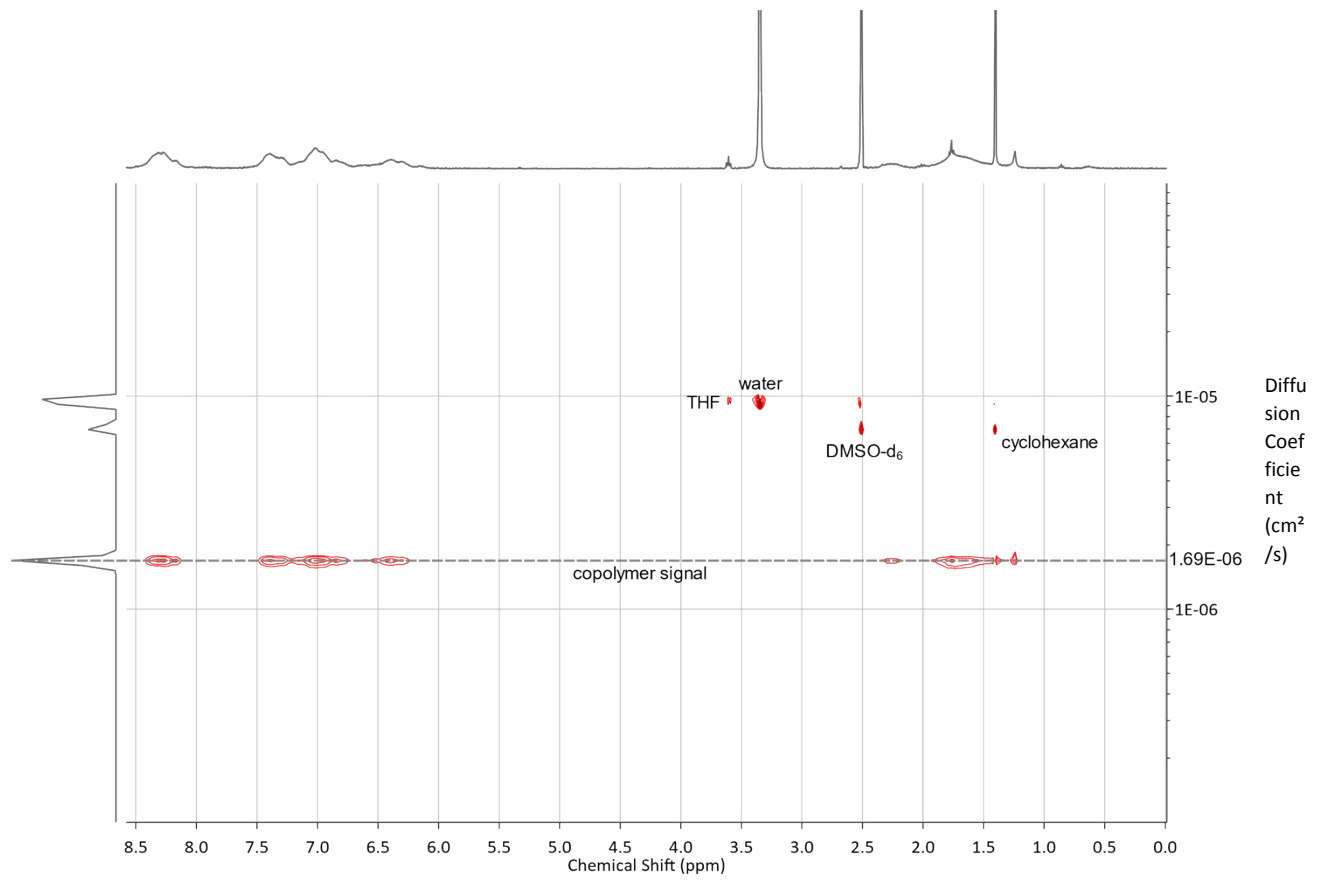

Figure S14: DOSY NMR spectrum (DMSO-d<sub>6</sub>, 400 MHz) of P(2-VP-stat-*m*-PyPE); 10% *m*-PyPE.

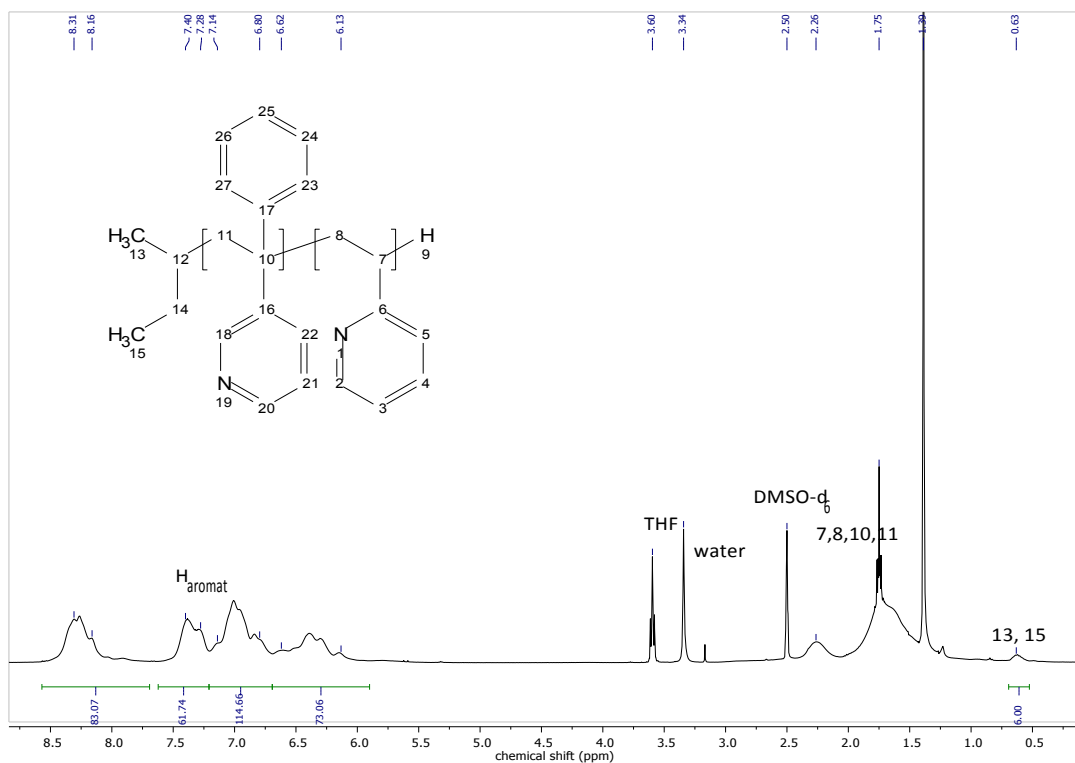

Figure S15:  $^1\text{H}$  NMR spectrum (DMSO- $d_6$ , 400 MHz) of P(2-VP-stat-*m*-PyPE); 15% *m*-PyPE.

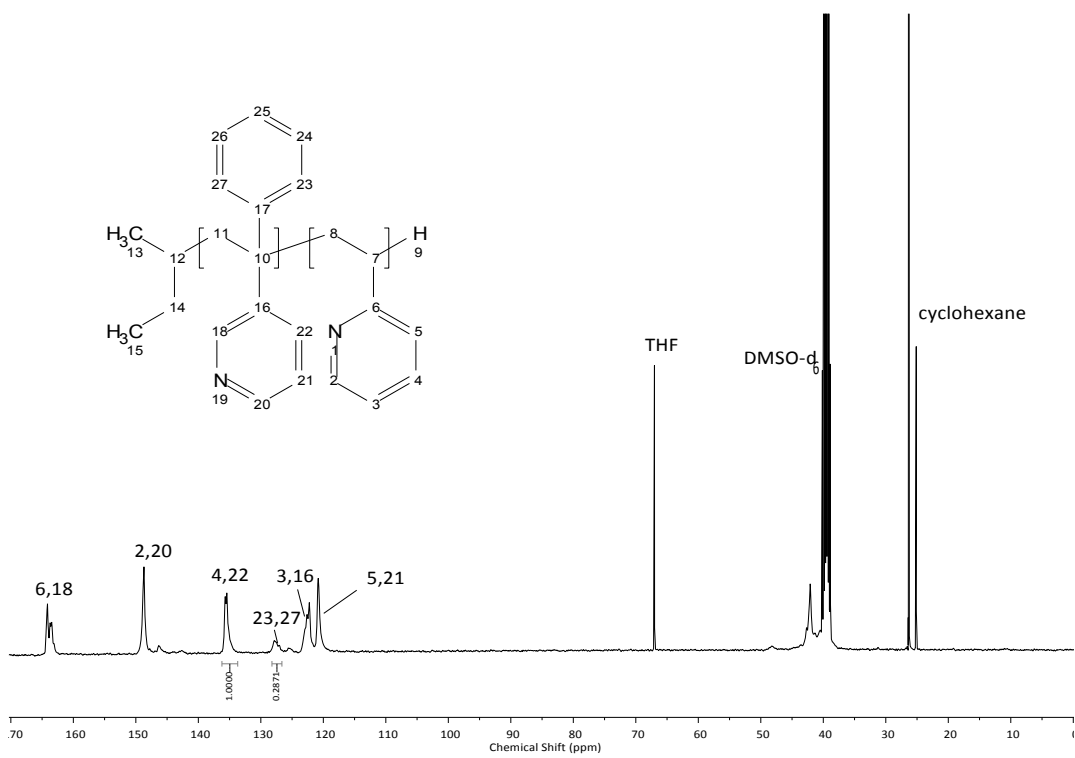

Figure S16: IG  $^{13}\text{C}$  NMR spectrum (DMSO- $d_6$ , 400 MHz) of P(2-VP-stat-*m*-PyPE); 15% *m*-PyPE.

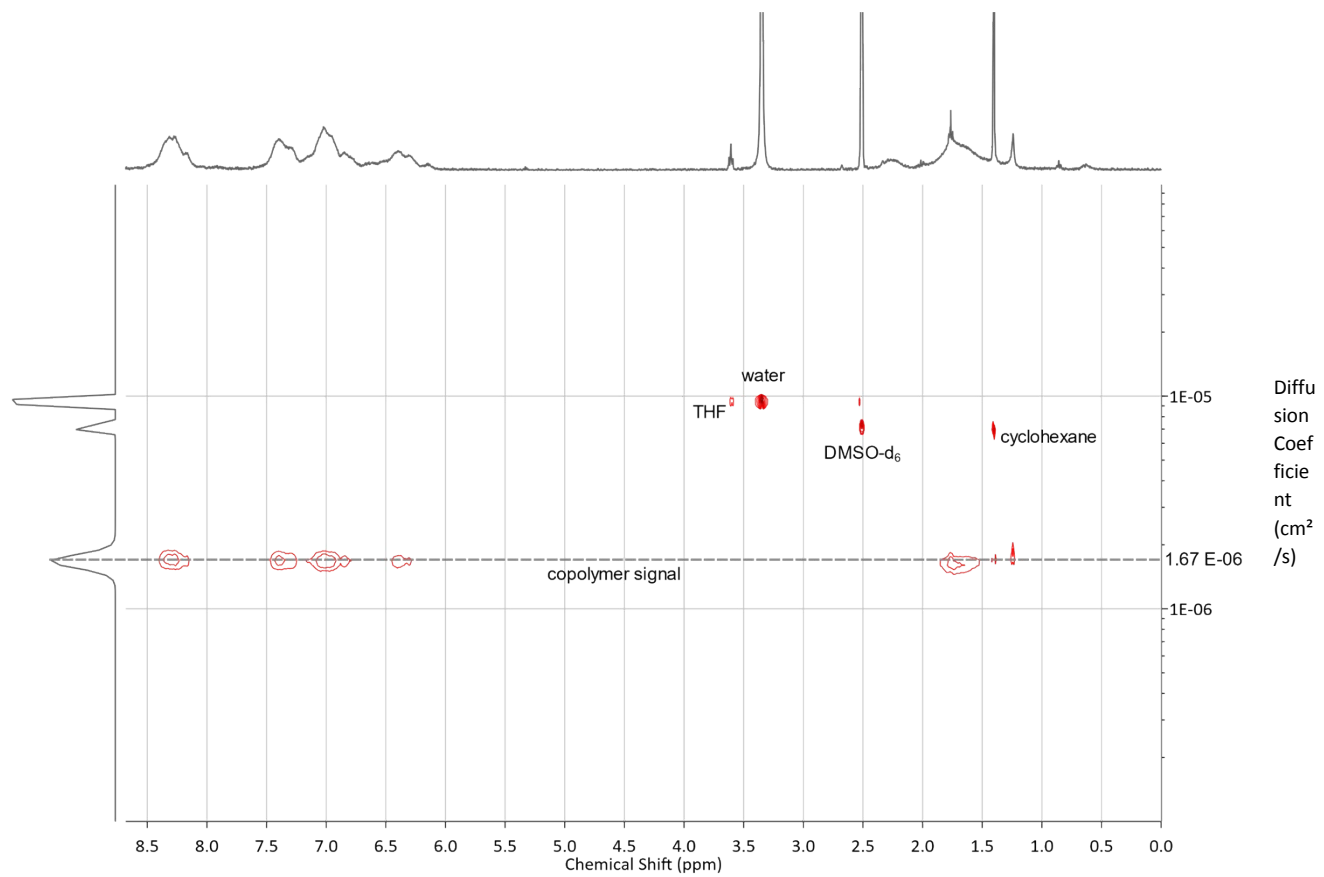

Figure S17: Figure S15: IG  $^{13}\text{C}$  NMR spectrum (DMSO- $d_6$ , 400 MHz) of P(2-VP-stat-*m*-PyPE); 15% *m*-PyPE.

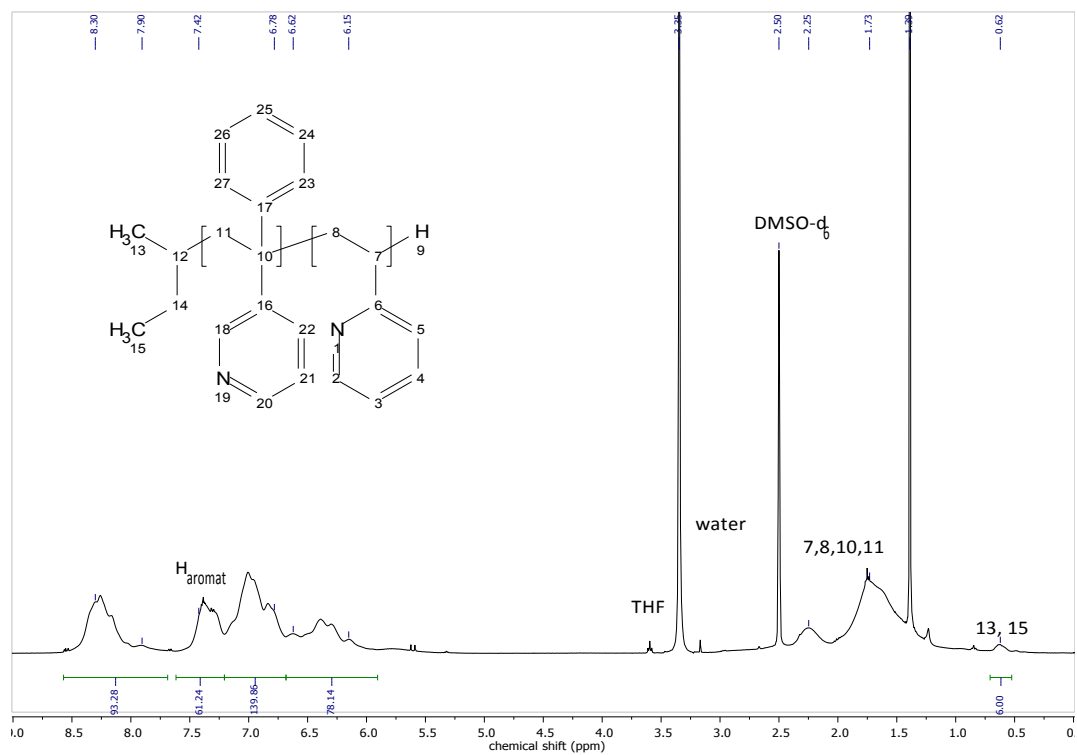

Figure S18: <sup>1</sup>H NMR spectrum (DMSO-d<sub>6</sub>, 400 MHz) of P(2-VP-stat-*m*-PyPE); 20% *m*-PyPE.

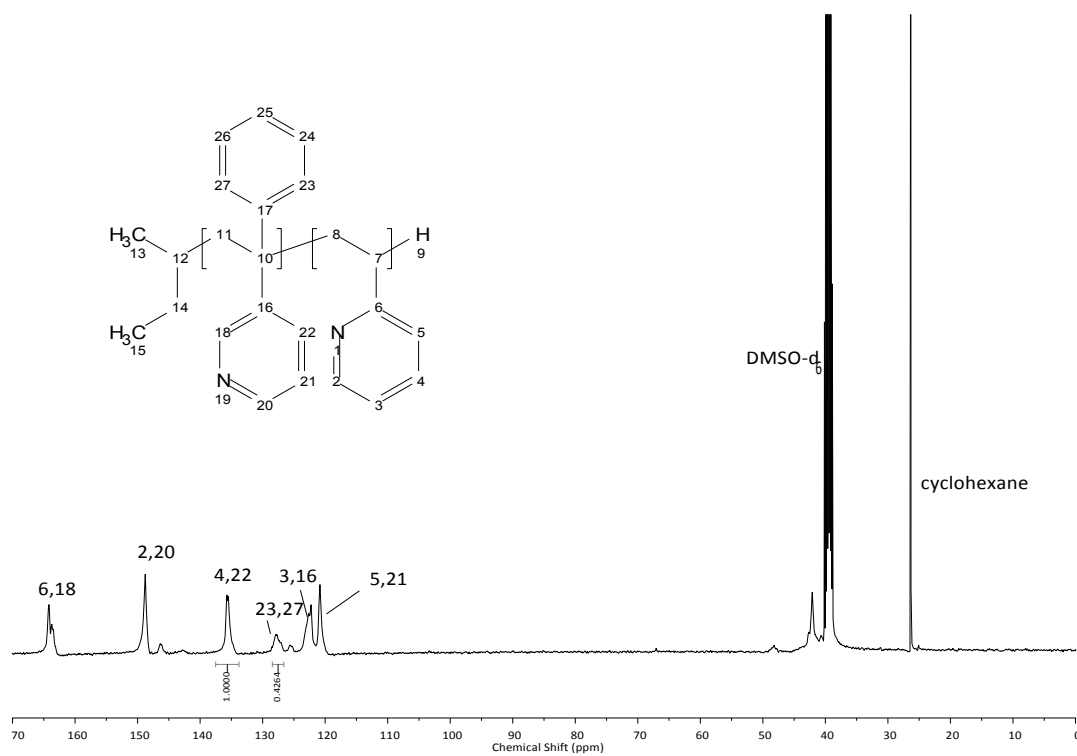

Figure S19: IG <sup>13</sup>C NMR spectrum (DMSO-d<sub>6</sub>, 400 MHz) of P(2-VP-stat-*m*-PyPE); 20% *m*-PyPE.

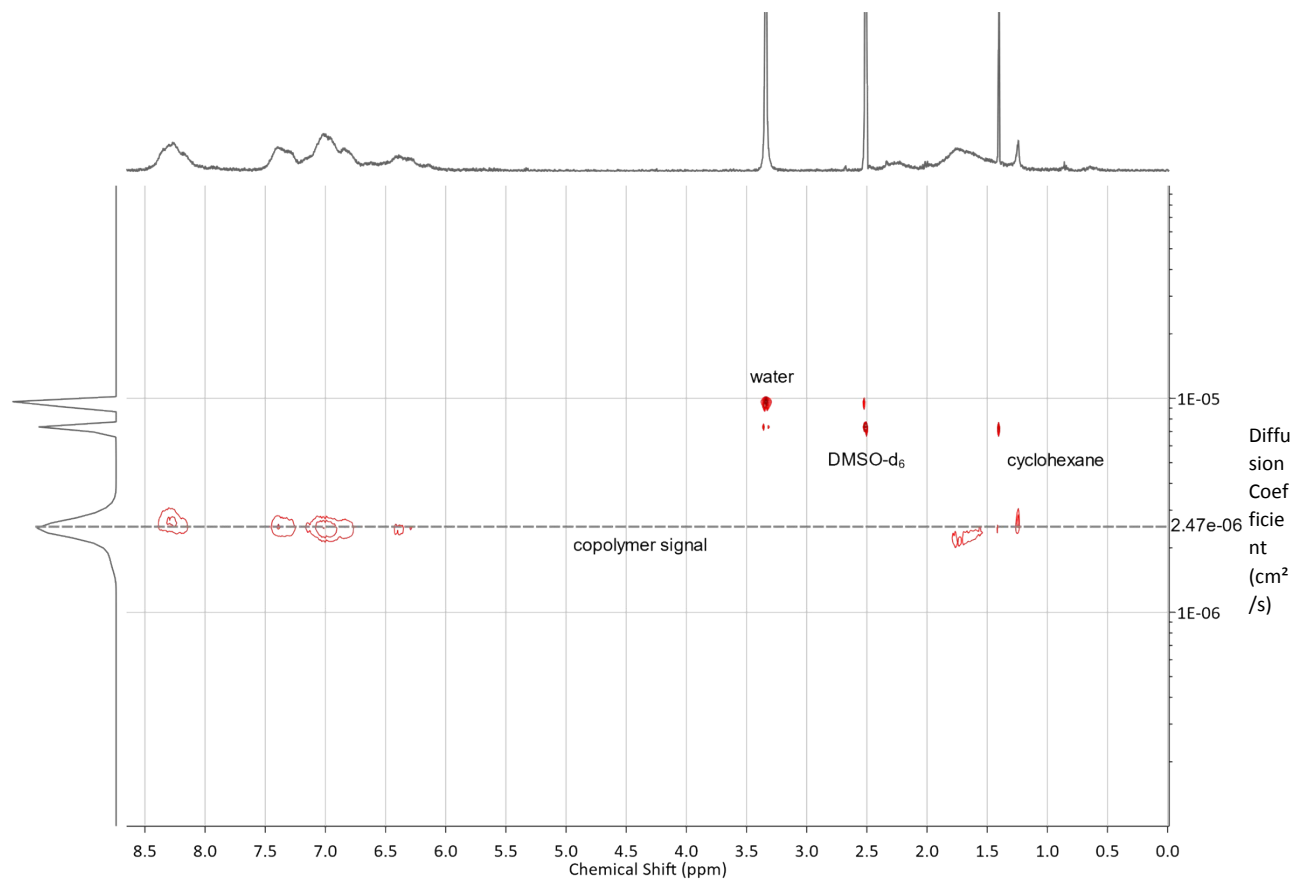

Figure S20: DOSY NMR spectrum (DMSO-d<sub>6</sub>, 400 MHz) of P(2-VP-stat-*m*-PyPE); 20% *m*-PyPE.

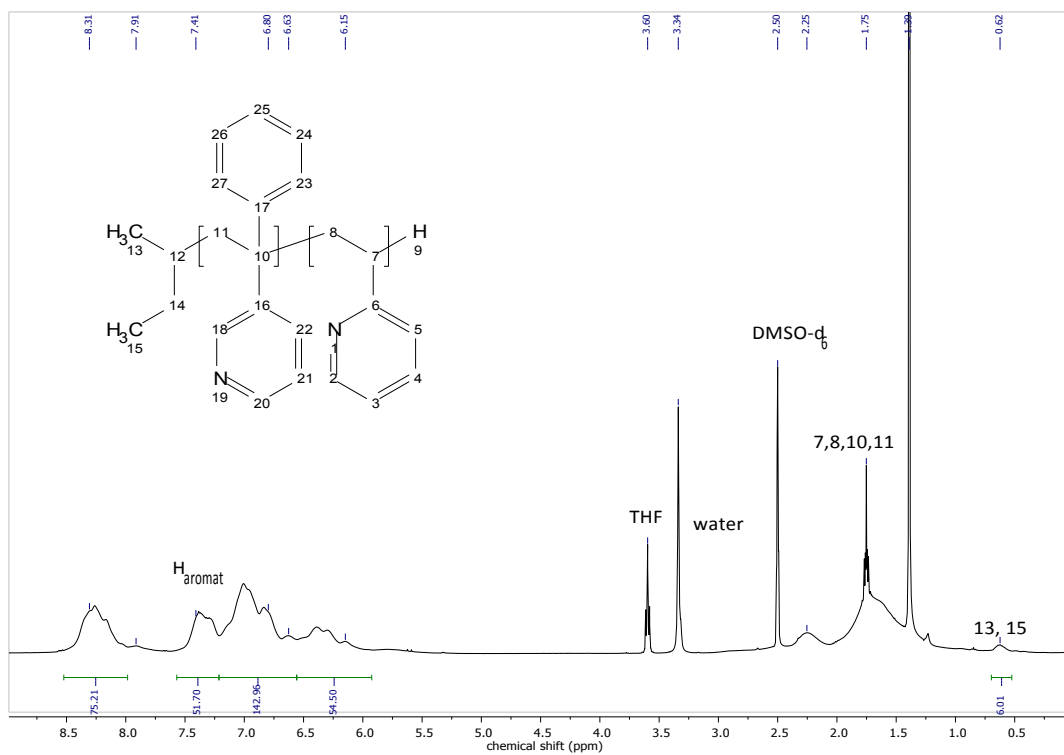

Figure S21: <sup>1</sup>H NMR spectrum (DMSO-d<sub>6</sub>, 400 MHz) of P(2-VP-stat-*m*-PyPE); 25% *m*-PyPE.

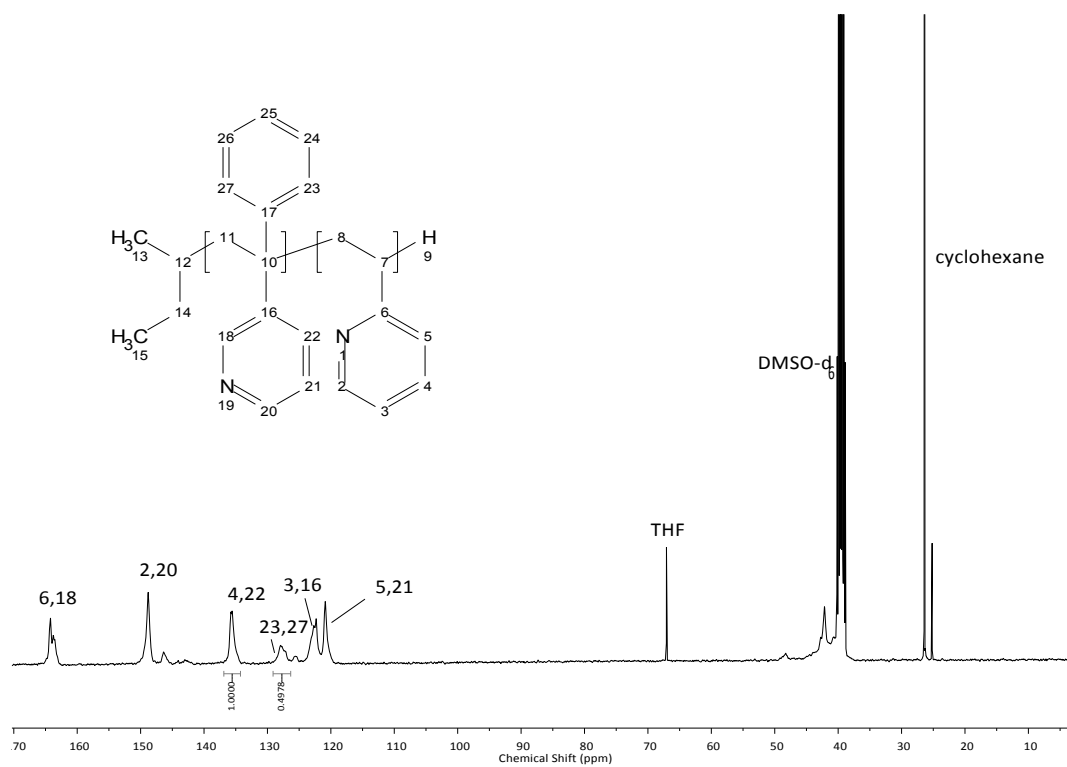

Figure S22: IG <sup>13</sup>C NMR spectrum (DMSO-d<sub>6</sub>, 400 MHz) of P(2-VP-stat-*m*-PyPE); 25% *m*-PyPE.



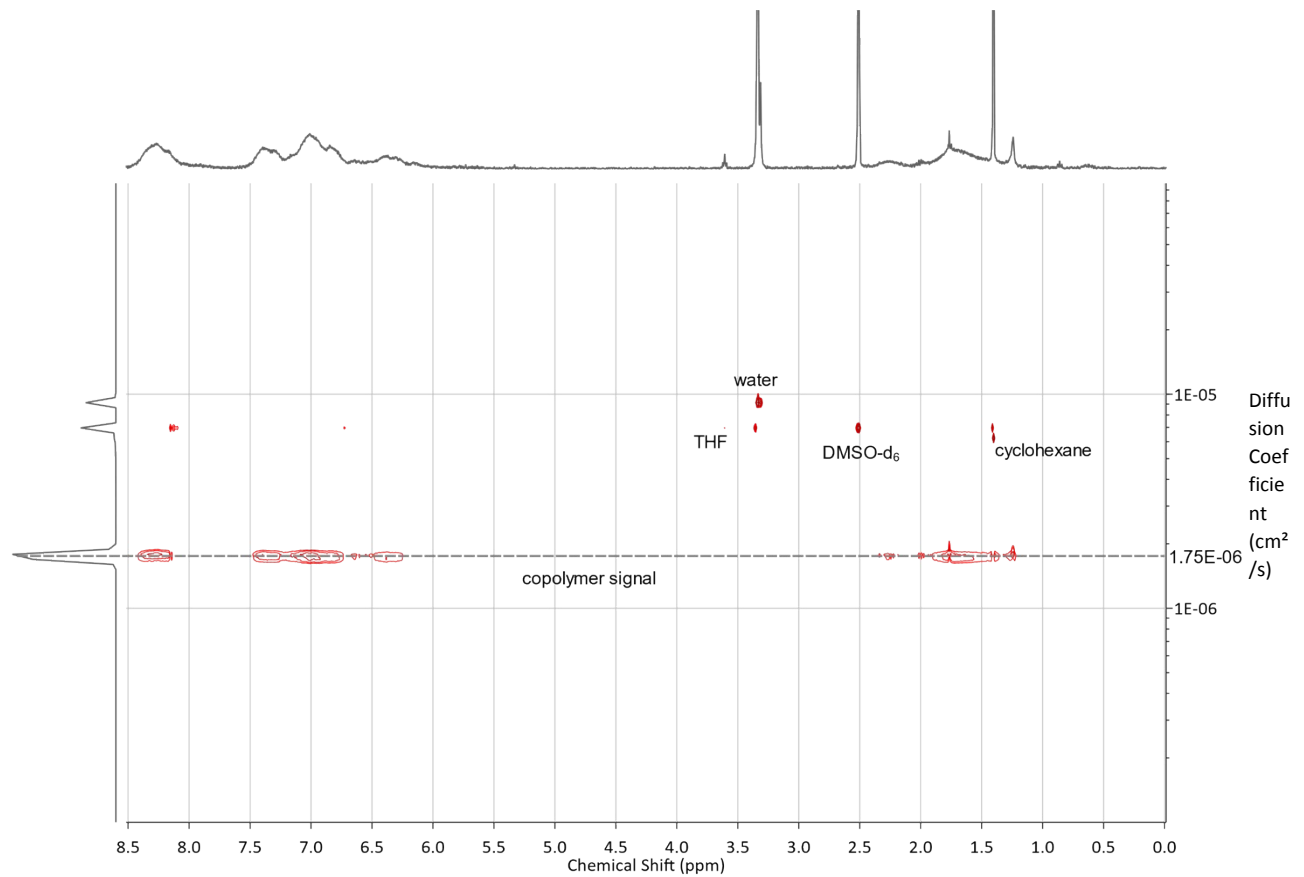

Figure S23: DOSY NMR spectrum (DMSO- $d_6$ , 400 MHz) of P(2-VP-*stat*-*m*-PyPE); 25% *m*-PyPE.

## Calculation of the overall copolymer composition

To facilitate the comparability of the physical values, the content of *m*PyPE with respect to the overall composition of the copolymers was calculated from the IG  $^{13}\text{C}$  NMR spectra, in addition to the 2-VP/*m*-PyPE ratio. We used equation S1, where  $I(\#)$  resembles the 2-VP signal, normalized to 1, and  $I(*)$  represents the respective *m*-PyPE signal of the polymers.

$$\text{mol\%m-PyPE}_{\text{calcb}} = \frac{0.5 \cdot I(*)}{I(\#) + 0.5 \cdot I(*)} = \frac{0.5 \cdot I(*)}{1 + 0.5 \cdot I(*)} \quad (\text{S1})$$

# Differential scanning calorimetry (DSC)

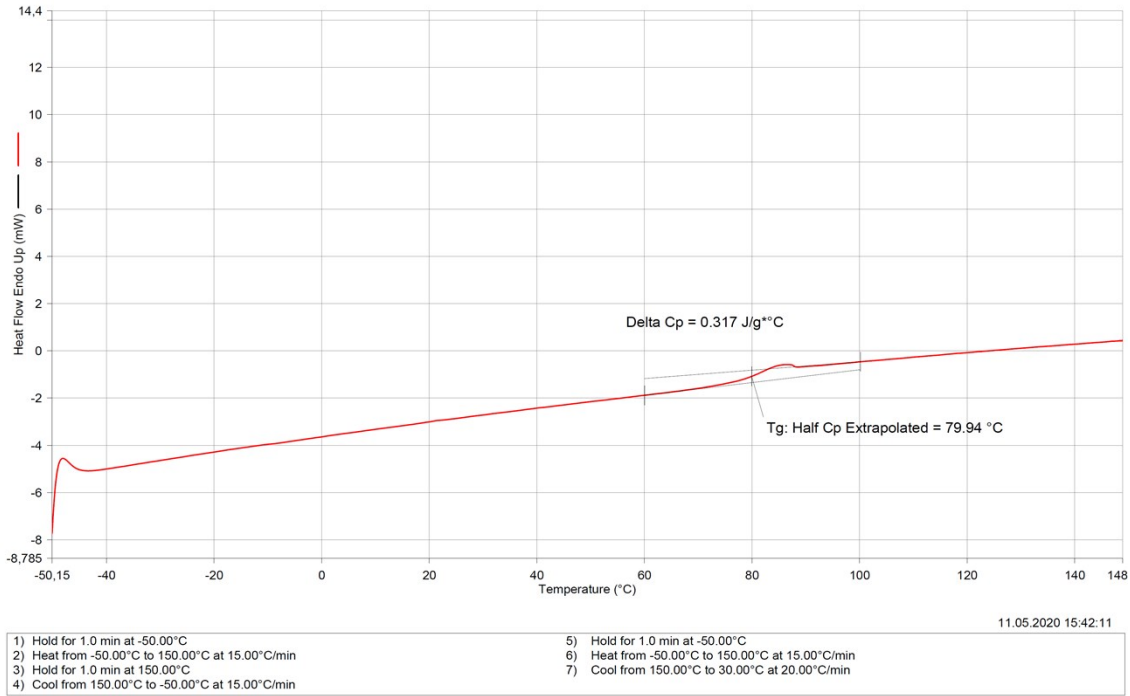

Figure S24: DSC curve of P(2-VP).

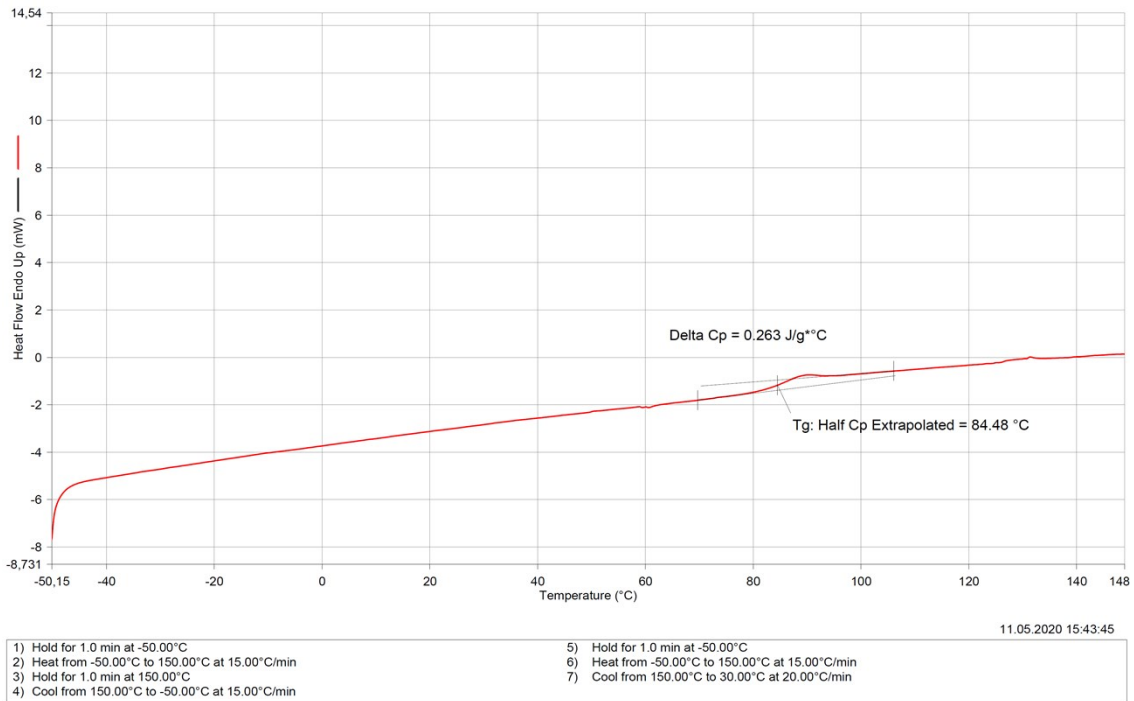

Figure S25: DSC curve of P(2-VP-stat-*m*-PyPE); 5% *m*-PyPE.

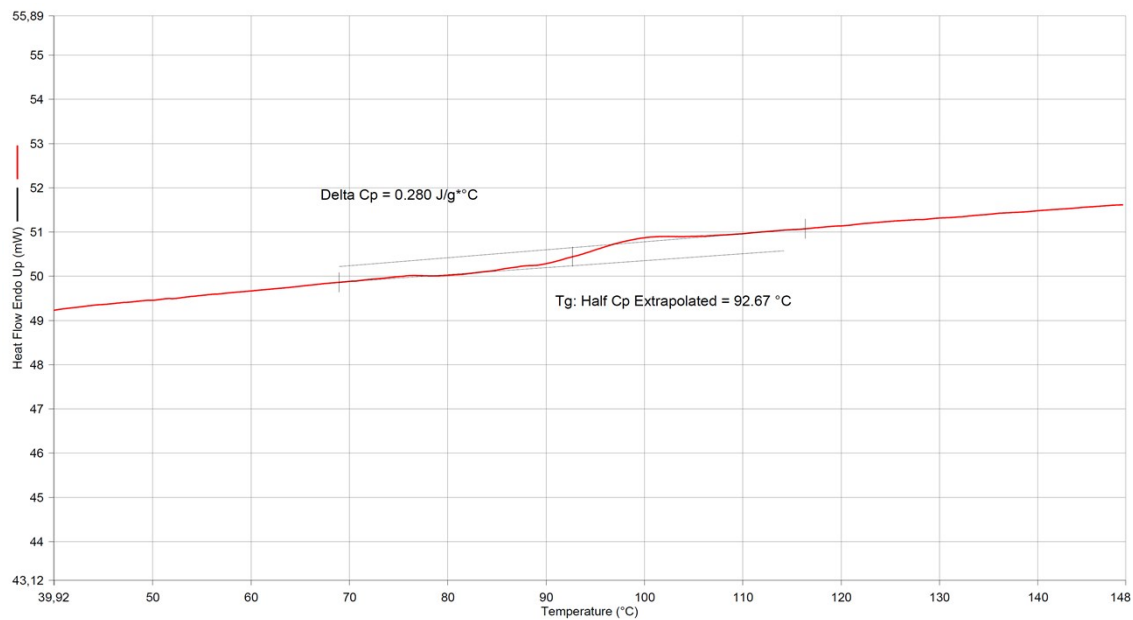

11.05.2020 16:10:08

- |                                                 |                                                 |
|-------------------------------------------------|-------------------------------------------------|
| 1) Heat from 30.00°C to 150.00°C at 20.00°C/min | 4) Hold for 2.0 min at 30.00°C                  |
| 2) Hold for 1.0 min at 150.00°C                 | 5) Heat from 30.00°C to 150.00°C at 20.00°C/min |
| 3) Cool from 150.00°C to 30.00°C at 20.00°C/min |                                                 |

Figure S26: DSC curve of P(2-VP-stat-*m*-PyPE); 10% *m*-PyPE.

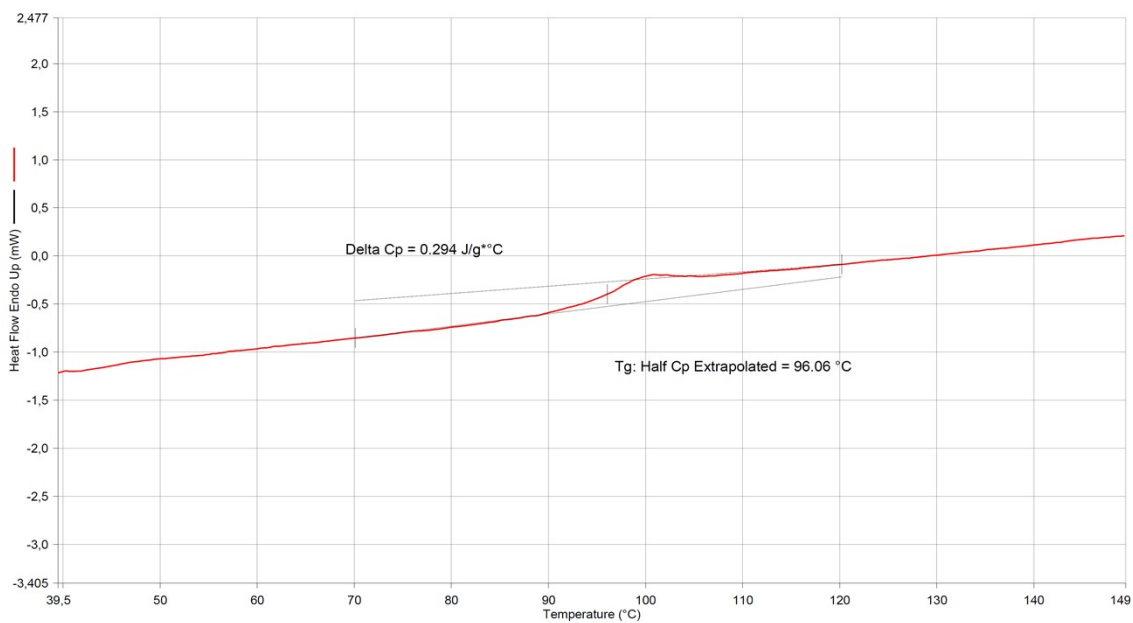

11.05.2020 16:16:38

- |                                                 |                                                 |
|-------------------------------------------------|-------------------------------------------------|
| 1) Hold for 3.0 min at 30.00°C                  | 4) Cool from 150.00°C to 30.00°C at 10.00°C/min |
| 2) Heat from 30.00°C to 150.00°C at 20.00°C/min | 5) Hold for 3.0 min at 30.00°C                  |
| 3) Hold for 3.0 min at 150.00°C                 | 6) Heat from 30.00°C to 150.00°C at 10.00°C/min |

Figure S27: DSC curve of P(2-VP-stat-*m*-PyPE); 15% *m*-PyPE.

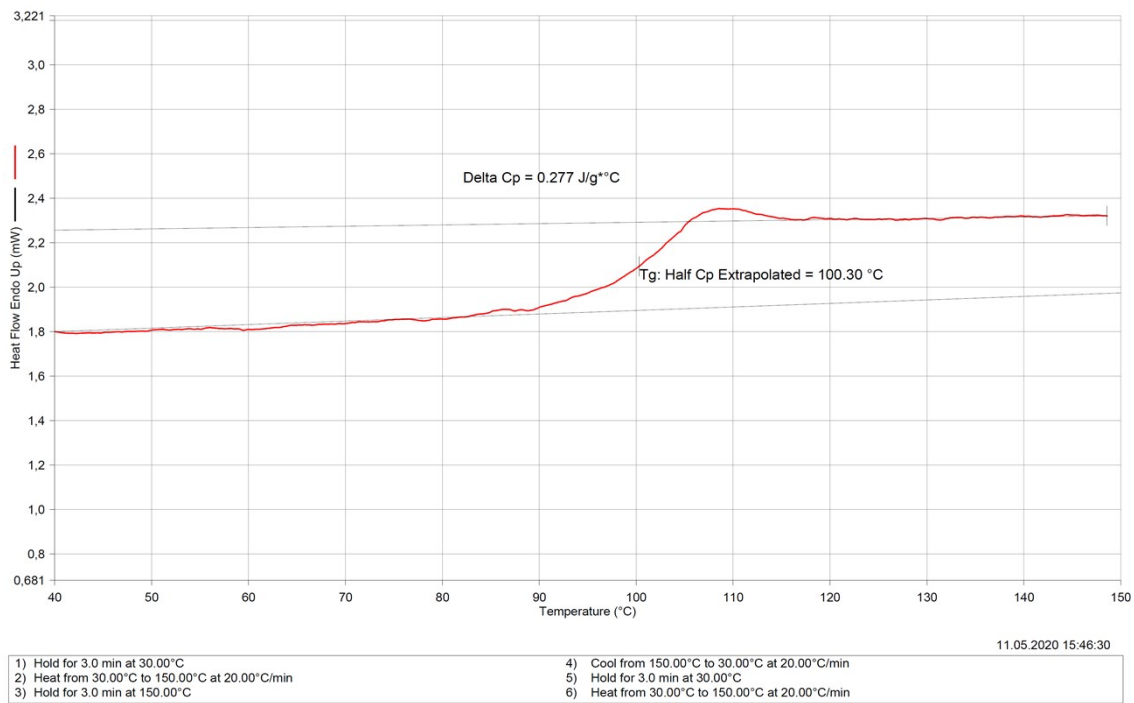

Figure S28: DSC curve of P(2-VP-stat-*m*-PyPE); 20% *m*-PyPE.

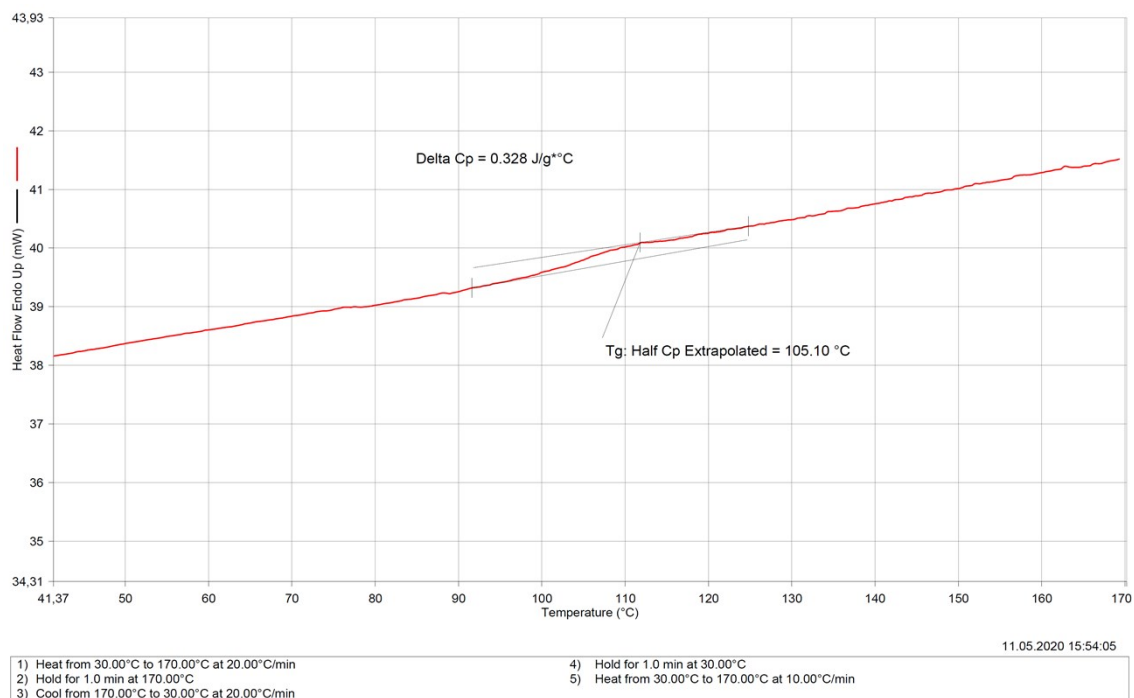

Figure S29: DSC curve of P(2-VP-stat-*m*-PyPE); 25% *m*-PyPE.

## Contact angle measurements

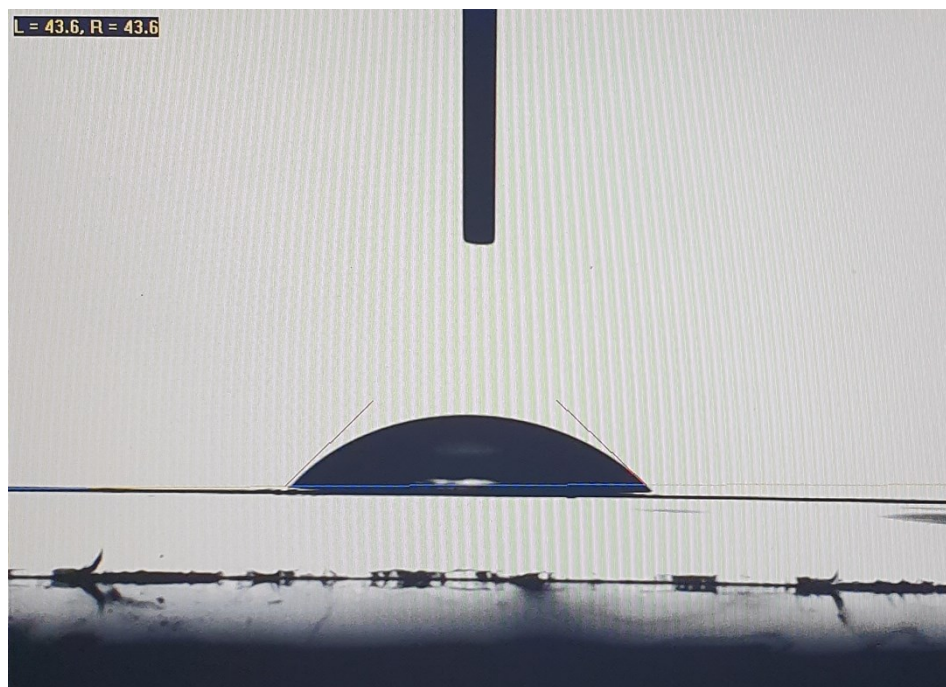

Figure S30: Exemplary contact angle of P(2-VP).

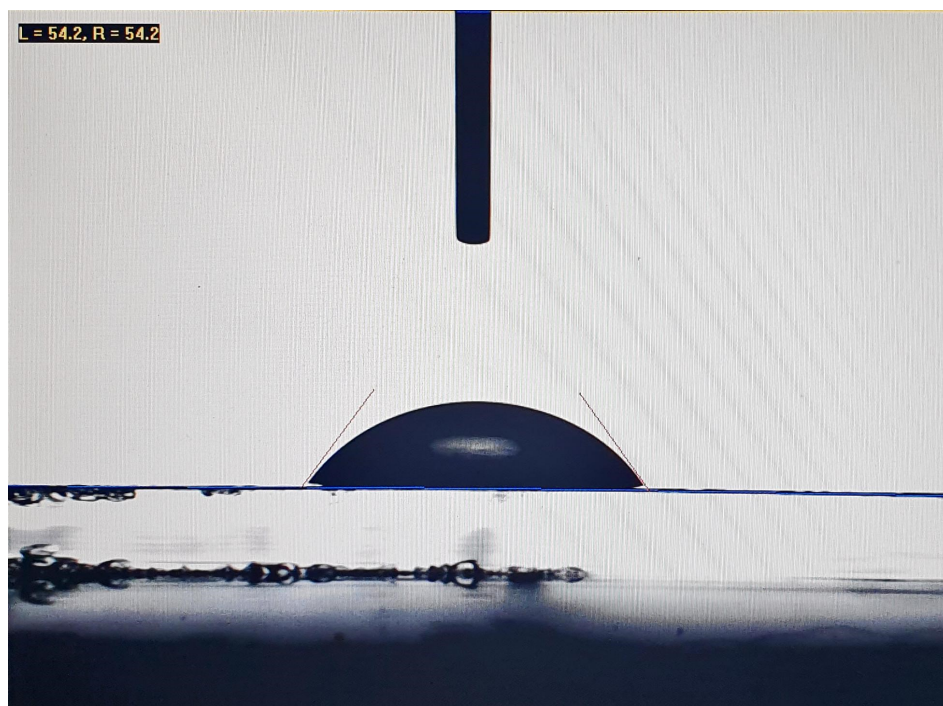

Figure S31: Exemplary contact angle of P(2-VP-stat-*m*-PyPE); 5% *m*-PyPE.

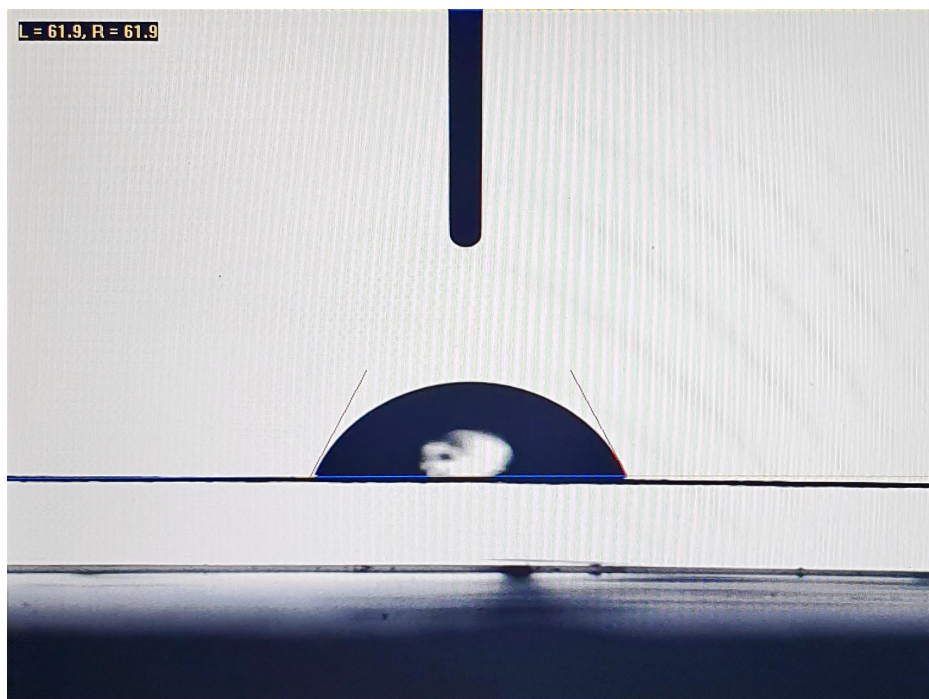

Figure S32: Exemplary contact angle of P(2-VP-stat-*m*-PyPE); 10% *m*-PyPE.

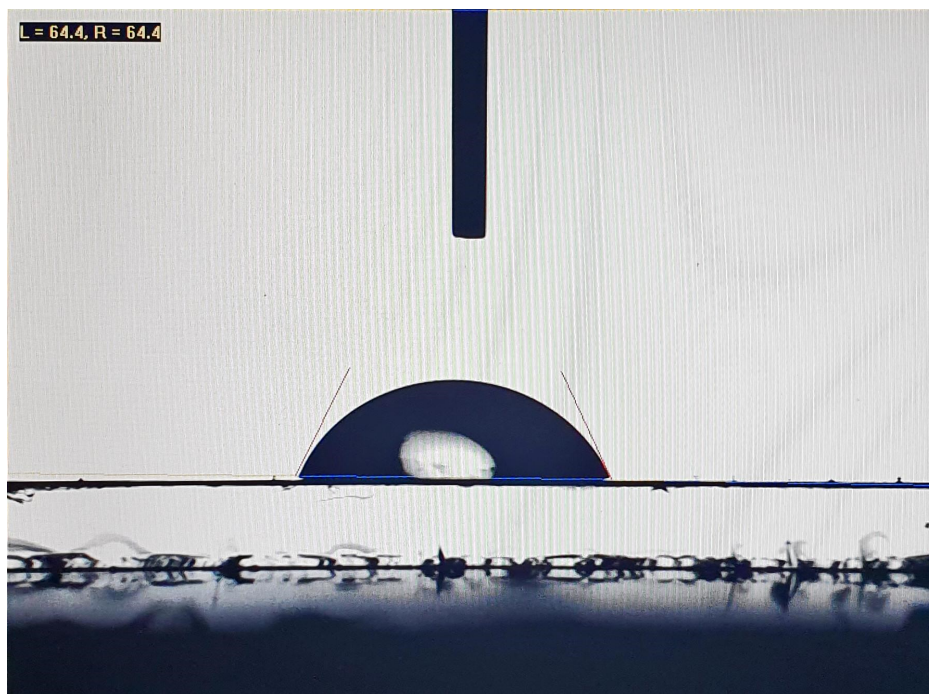

Figure S33: Exemplary contact angle of P(2-VP-stat-*m*-PyPE); 15% *m*-PyPE.

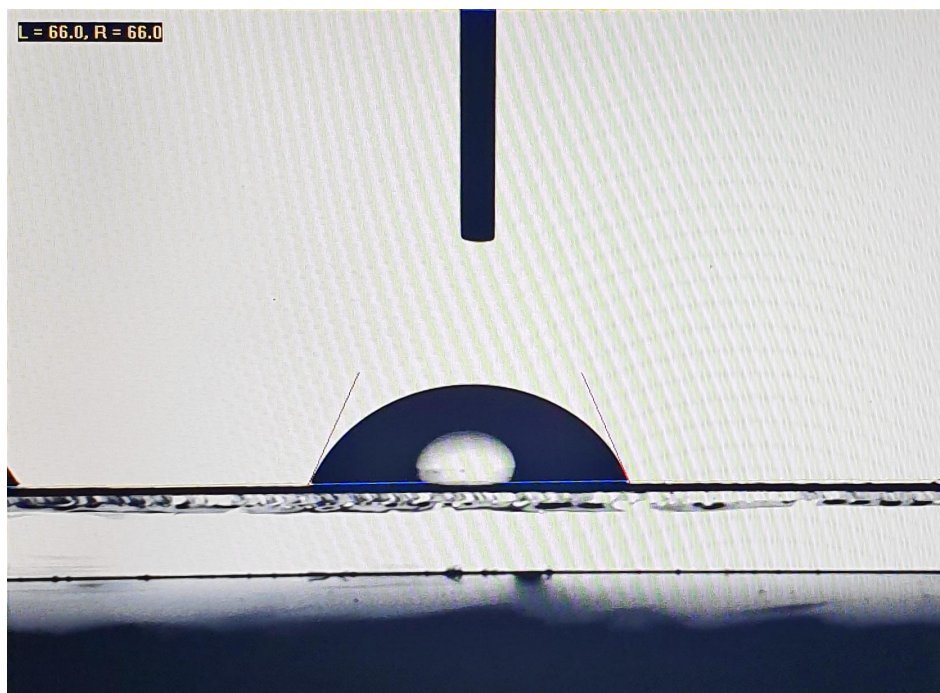

Figure S34: Exemplary contact angle of P(2-VP-stat-*m*-PyPE); 20% *m*-PyPE.

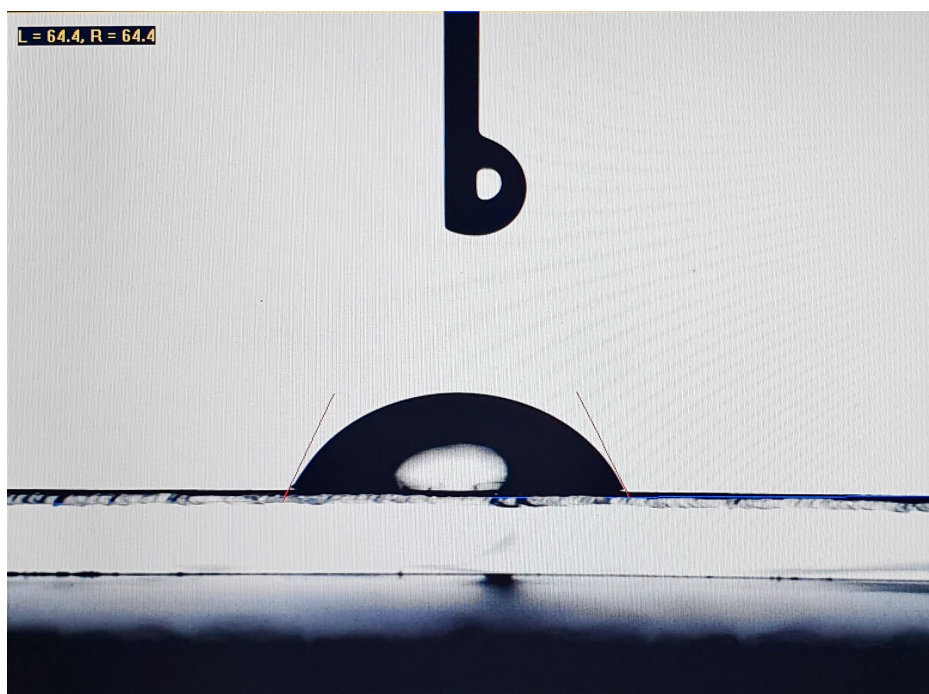

Figure S35: Exemplary contact angle of P(2-VP-stat-*m*-PyPE); 25% *m*-PyPE.

Table S1: Overview of all measured contact angles and the resulting average.

| % <i>m</i> -PyPE | M1 / ° | M2 / ° | M3 / ° | M4 / ° | M5 / ° | M6 / ° | $\overline{CA} / °$ |
|------------------|--------|--------|--------|--------|--------|--------|---------------------|
| 0                | 45.3   | 45.2   | 41     | 41.1   | 43.6   | 50.3   | 44.4 ± 3.1          |
| 5                | 57     | 54.4   | 54.2   | 49.6   | -      | -      | 53.8 ± 2.7          |
| 10               | 63.2   | 61.9   | 60     | 61.2   | 62.1   | -      | 61.7 ± 1.1          |
| 15               | 60.7   | 66.1   | 64.5   | 63.6   | 64.4   | -      | 63.9 ± 1.8          |
| 20               | 66.9   | 63.3   | 65.6   | 67.4   | 66     | 63.5   | 65.5 ± 1.6          |
| 25               | 63.5   | 64.3   | 64.8   | 63.2   | 64.4   | 61.8   | 63.7 ± 1.0          |
